# Supplementary material
Source: PubMed Central journal article supplement (PMC4140536)

## Supporting Information

### Progesterone-Targeted Magnetic Resonance Imaging Probes

Taryn R. Townsend<sup>1</sup>, Georgette Moyle-Heyrman<sup>2</sup>, Preeti A. Sukerkar<sup>1</sup>, Keith W. MacRenaris<sup>1</sup>, Joanna E. Burdette<sup>2</sup>, Thomas J. Meade<sup>1</sup>

#### Table of Contents:

Page:

|    |                                                                          |
|----|--------------------------------------------------------------------------|
| S2 | Synthetic Scheme of Complexes 2 and 3                                    |
| S3 | Cytotoxicity of Complexes in PR- MDA-MB-231 Cell Line                    |
| S4 | Luciferase Assay with RU-486 Antagonist Control (Competition Assay)      |
| S5 | Biodistribution of complex 1 in CD-1 Mice with Clearance Organs Included |
| S6 | HPLC ELSD Trace for Complex 2                                            |
| S7 | HPLC ELSD Trace for Complex 3                                            |

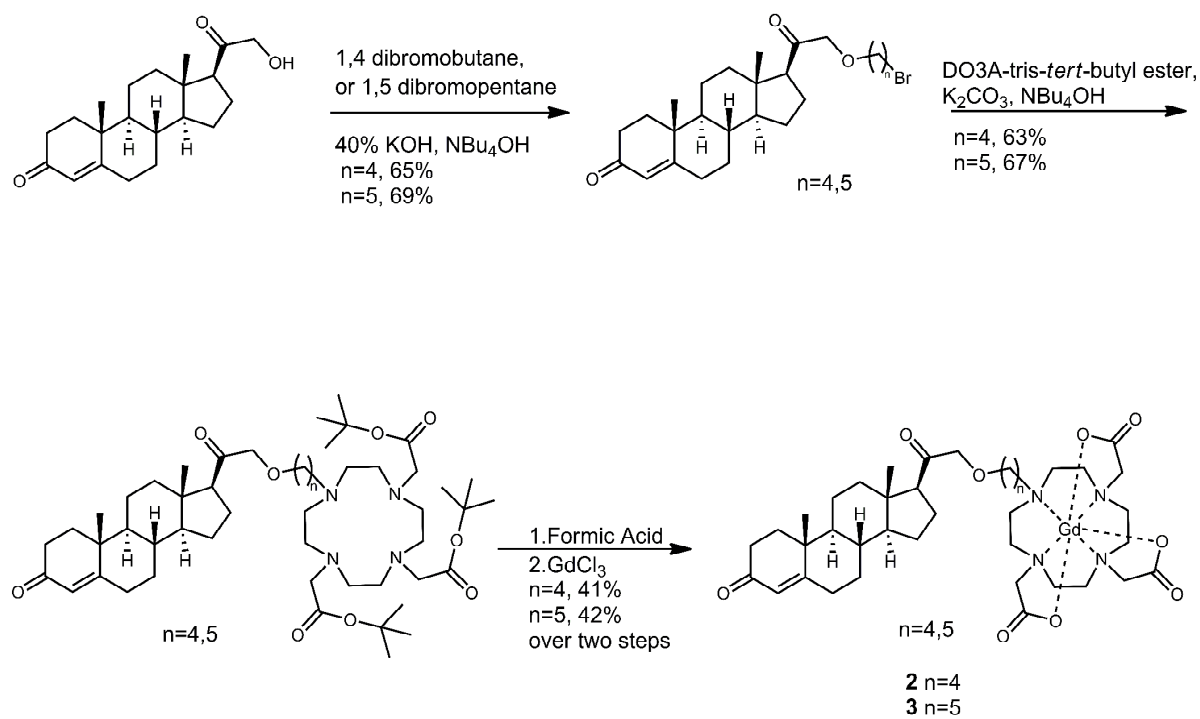

**Figure S1:** Synthetic scheme of PR-targeted MR Contrast Probes

## Cytotoxicity of Complexes in PR- Cell Line

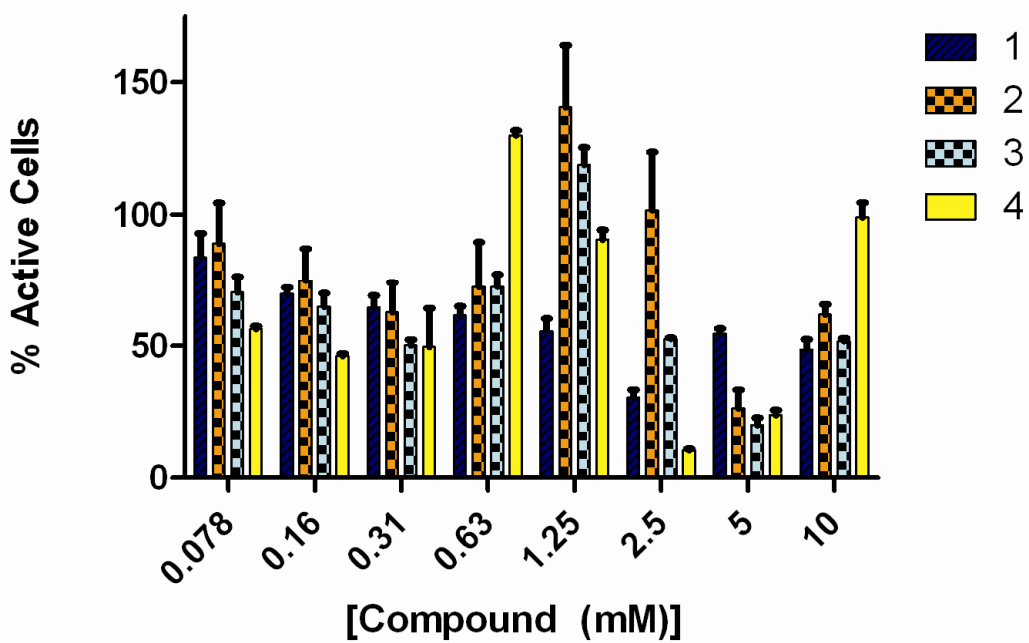

Figure S2: Cytotoxicity of complexes 1-4 in PR- MDA-MB-231 cells.

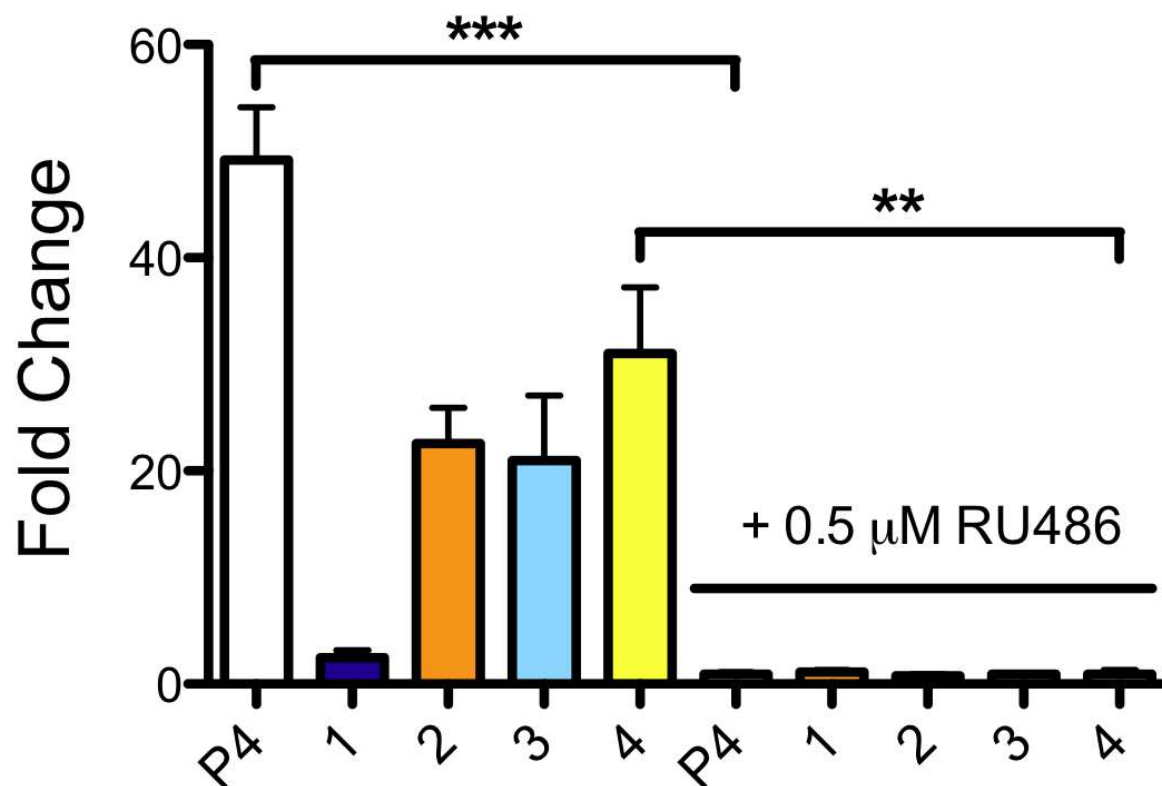

**Figure S3:** Luciferase activity induced by contrast probes is blocked by RU-486, a synthetic PR antagonist. This implies that luciferase activity seen is related to probe interaction with PR. Error bars represent  $\pm$  one standard deviation. Statistical differences, as indicated by asterisks, were determined using a one way ANOVA test. \* $p < 0.01$  (relative to all other compounds) \*\*\*  $p < 0.001$ , \*\*  $p < 0.01$

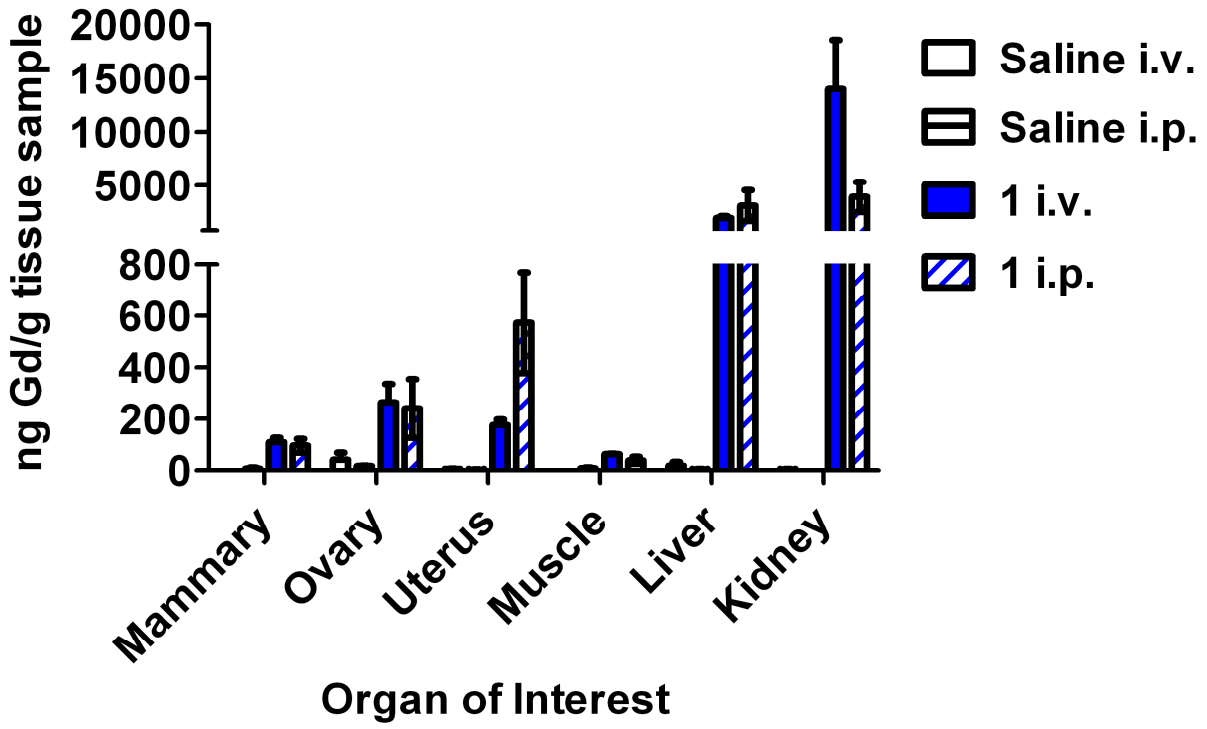

**Figure S4:** Biodistribution at 6 hour time point including organs used for contrast agent clearance (liver and kidney).

**{2,2',2''-(10-(4-(2-((10R,13S,17S)-10,13-dimethyl-3-oxo-2,3,6,7,8,9,10,11,12,13,14,15,16,17-tetradecahydro-1H-cyclopenta[a]phenanthren-17-yl)-2-oxoethoxy)butyl)-1,4,7,10-tetraazacyclododecane-1,4,7-triyl)triacetatgadolinium (2).** HRMS (ESI)  $m/z$   $[M + H]^+$  observed: 886.3590, calculated 886.36019 for  $C_{39}H_{60}GdN_4O_9$ . Analytical HPLC trace of the purified product is shown below.

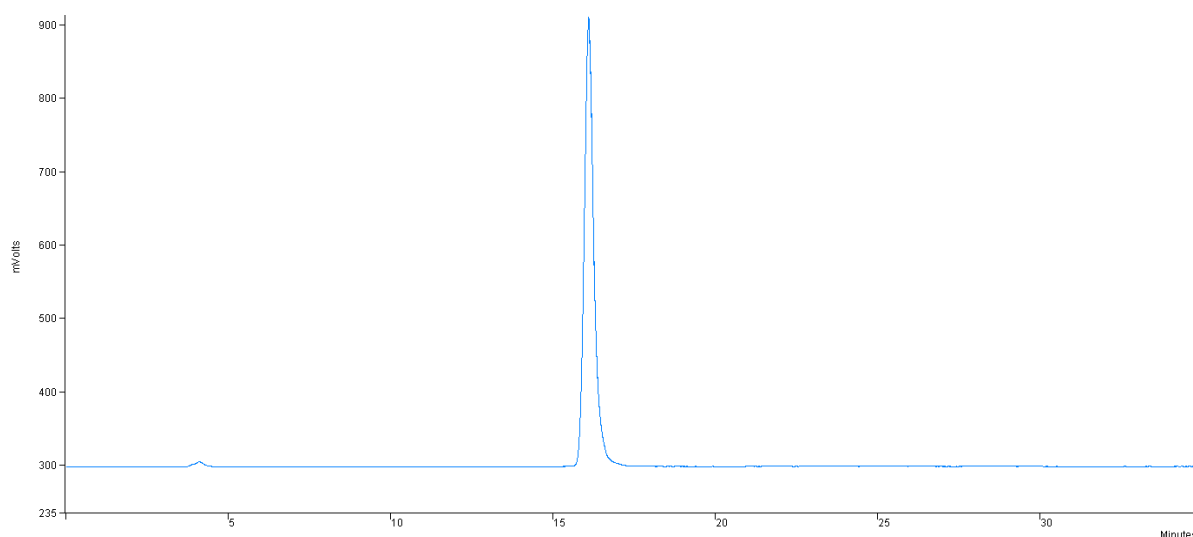

**2,2',2''-(10-(5-(2-((10R,13S,17S)-10,13-dimethyl-3-oxo-2,3,6,7,8,9,10,11,12,13,14,15,16,17-tetradecahydro-1H-cyclopenta[a]phenanthren-17-yl)-2-oxoethoxy)pentyl)-1,4,7,10-tetraazacyclododecane-1,4,7-triyl)triacetic acid**  
**(3)**. HRMS (ESI)  $m/z$   $[M + H]^+$  observed: 900.3726, calculated 900.37584 for  $C_{40}H_{62}GdN_4O_9$ . Analytical HPLC trace of the purified product is shown below.

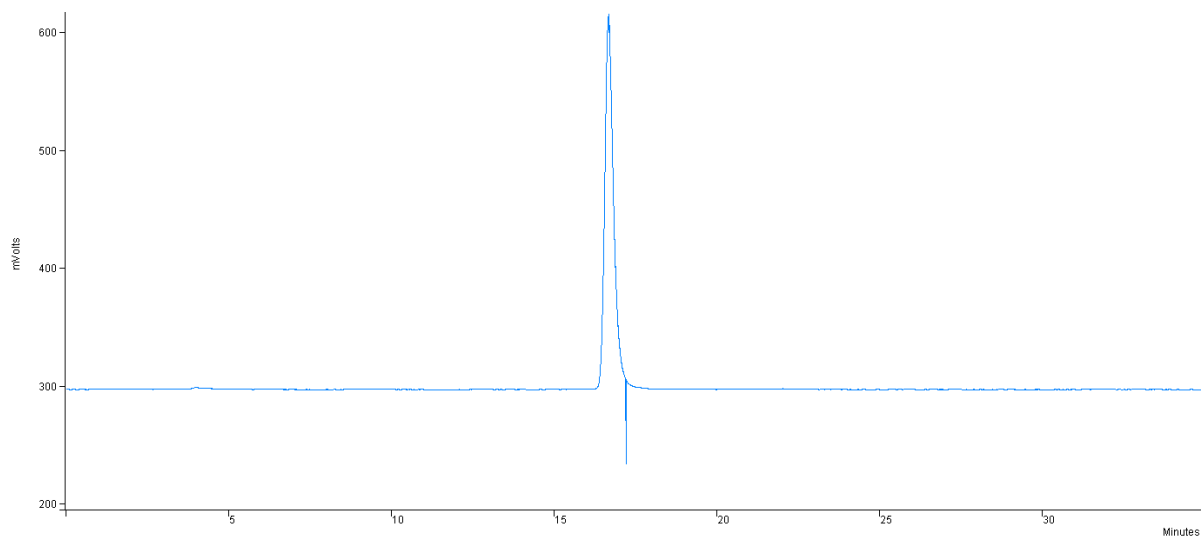

Supplement: bc500265h_si_001.pdf [file bc500265h_si_001.pdf]
